# Supplementary material
Source: publisher figshare collection journal article supplement (https://acs.figshare.com/ndownloader/files/4780657)

**Selective Synthesis of Epolactaene Featuring Efficient Construction of Methyl  
(Z)-2-Iodo-2-butenolate and (2R,3S,4S)-2-Trimethylsilyl-2,3-epoxy-4-methyl- $\gamma$ -  
butyrolactone**

Ze Tan and Ei-ichi Negishi

**Supplemental Information**

**General Procedures.** All reactions were run under a dry Ar atmosphere. Reactions were monitored by GC analysis of reaction aliquots. GC analysis was performed on an HP6890 Gas Chromatograph using an HP-5 capillary column (30 m x 0.32 mm, 0.5  $\mu$ M film) packed with SE-30 on Chromosorb W. Column chromatography was carried out on 230-400 mesh silica gel.  $^1\text{H}$  and  $^{13}\text{C}$  NMR spectra were recorded on a Varian-Inova-300 spectrometer. THF was distilled from sodium/benzophenone.  $\text{ZnBr}_2$  was flame-dried under vacuum. The starting materials were purchased from commercial sources and used as received. Optical rotations were measured on an Autopol III polarimeter.

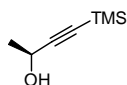

**(S)-4-Trimethylsilyl-3-butyn-2-ol.**<sup>a</sup> To a mixture of (S)-3-butyn-2-ol (3.91 mL, 50 mmol) in THF (250 mL) at -78 °C was added dropwise *n*-butyllithium (2.5 M in hexanes, 40 mL, 100 mmol). After stirring for 1 h at -78 °C, TMSCl (15.8 mL, 125 mmol) was added via syringe. The reaction mixture was slowly warmed to room temperature and stirred overnight. The reaction mixture was concentrated via vacua to around 50 mL, then 50 mL of 3 N HCl was added. The mixture was stirred for 1 h and extracted with ether. The combined organic layers were washed with  $\text{NaHCO}_3$ , brine,

dried over  $\text{MgSO}_4$ , filtered and concentrated. Vacuum distillation gave 7.1 g of the desired product in 85% yield: b.p.  $75^\circ\text{C}$  (15 mmHg),

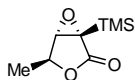

**(2R,3S,4S)-2-Trimethylsilyl-2,3-epoxy-4-methyl- $\gamma$ -butyrolactone (4).**<sup>b</sup> To a mixture of *i*-BuMgCl (2.0 M in Ether, 50 mL, 100 mmol) in ether (50 mL) was added  $\text{Cp}_2\text{TiCl}_2$  (0.5 g, 2.0 mmol) at  $0^\circ\text{C}$ . The mixture was stirred for 15 min and (*S*)-4-trimethylsilyl-3-butyne-2-ol (5.68 g, 40 mmol) was added slowly. The reaction mixture was warmed up to room temperature and stirred overnight. Then  $\text{CO}_2$  was vigorously bubbled through the reaction mixture until the whole reaction mixture turned into a gel. 3 N HCl (40 mL) was added carefully and the mixture was stirred at room temperature for 2 h. The mixture was extracted with ether and the ether layers were combined. The combined ether layers were washed with  $\text{NaHCO}_3$ , brine, dried over  $\text{MgSO}_4$ , filtered and concentrated. Vacuum distillation gave 5.03 g of the desired product in 71% yield:

To a mixture of the lactone obtained above (1.31 g, 7.7 mmol) in pyridine (30 mL) at  $0^\circ\text{C}$  was added NaOCl (10-13%, 16.2 mL, 23 mmol). After 12 h at  $0^\circ\text{C}$ , aqueous  $\text{NaHCO}_3$  (1 M, 12 mL) was added and the resultant solution was extracted with ether. The organic layers were washed several times with 6 N HCl until all the pyridine was neutralized (checking with pH-paper). It was washed with  $\text{NaHCO}_3$ , brine, dried over  $\text{MgSO}_4$ , filtered and concentrated. Flash column chromatography on silica gel (90:10 hexanes:ethyl acetate) gave 730 mg the desired product as a low-melting solid in 51% yield:  $[\alpha]_D^{23} -52^\circ$  (c 1.1  $\text{CHCl}_3$ );  $^1\text{H}$  NMR ( $\text{CDCl}_3$ , 300 MHz)  $\delta$  0.22 (s, 9 H), 1.35 (d,  $J = 6.7$  Hz, 3 H), 3.75 (s, 1 H), 4.69 (q,  $J = 6.7$  Hz, 1 H);  $^{13}\text{C}$  NMR ( $\text{CDCl}_3$ , 75 MHz)  $\delta$  -3.61

(3C), 18.32, 51.99, 63.68, 75.43, 173.68. ppm; IR 2962, 2904, 1767, 1450, 1383, 1333, 1254  $\text{cm}^{-1}$ ; HRMS for  $\text{C}_8\text{H}_{14}\text{O}_3\text{Si}$  ( $\text{M}^+$ ) calcd. 186.0712, found 186.0713.

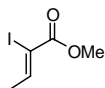

**Methyl (Z)-2-Iodo-2-buten-1-olate (3).** To a mixture of CuI (19 g, 100 mmol) in 150 mL of ether, TMEDA (20 mL) under Ar at  $-45\text{ }^{\circ}\text{C}$  was added 62.5 mL of Methyllithium (1.6 M in ether). After 3.5 h at  $-45\text{ }^{\circ}\text{C}$ , the mixture was cooled to  $-78\text{ }^{\circ}\text{C}$  and methyl propiolate (8.4 g, 100 mmol) was added slowly. The mixture was stirred and kept at  $-78\text{ }^{\circ}\text{C}$  for 12 h until a solution of  $\text{I}_2$  (30.5 g, 120 mmol) in THF was added via canula. After 3 h, the reaction mixture was quenched with saturated  $\text{NH}_4\text{Cl}$ . The reaction mixture was extracted with ether and the combined organic layers were washed with  $\text{Na}_2\text{S}_2\text{O}_3$ , brine, dried over  $\text{MgSO}_4$ , filtered and concentrated. The residue was purified through column chromatography (silica gel, 2% EA/Hexanes) to give 14 g of the desired product in 62% yield as a colorless liquid. The compound is stable in freezer for several months, however, decomposition slowly took place:  $^1\text{H}$  NMR ( $\text{CDCl}_3$ , 300 MHz)  $\delta$  1.95 (d,  $J = 6.7\text{ Hz}$ , 3 H), 3.82 (s, 3 H), 7.32 (q,  $J = 6.7\text{ Hz}$ , 1 H);  $^{13}\text{C}$  NMR ( $\text{CDCl}_3$ , 75 MHz)  $\delta$  22.90, 53.40, 95.92, 148.75, 163.28 ppm.

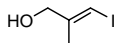

**(E)-3-Iodo-2-methyl-2-propen-1-ol (5).**<sup>d</sup> To a mixture of  $\text{Me}_3\text{Al}$  (25 mL, 250 mmol) and  $\text{Cp}_2\text{ZrCl}_2$  (29.2 g, 100 mmol) in  $\text{CH}_2\text{Cl}_2$  (100 mL) at  $0\text{ }^{\circ}\text{C}$  was added dropwise a solution of propargyl alcohol (5.68 g, 100 mmol) in  $\text{CH}_2\text{Cl}_2$  (20 mL). After stirring for 14 h at rt, the reaction mixture was treated with a solution of  $\text{I}_2$  (30.5 g, 120 mmol) in THF (50 mL) at  $-78\text{ }^{\circ}\text{C}$ , warmed to  $23\text{ }^{\circ}\text{C}$ , and quenched with 3 N HCl. The mixture was extracted with ether, washed with  $\text{NaHCO}_3$ ,  $\text{Na}_2\text{S}_2\text{O}_3$ , brine, dried over  $\text{MgSO}_4$ , filtered

and concentrated. The residue was distilled under vacuum to afford 11 g of the desired product (55%): b.p. 82-85 °C (2.5 mmHg);  $^1\text{H}$  NMR ( $\text{CDCl}_3$ , 300 MHz)  $\delta$  1.83 (s, 3 H), 2.15 (bs, 1 H), 4.10 (s, 2 H), 6.26 (s, 1 H);  $^{13}\text{C}$  NMR ( $\text{CDCl}_3$ , 75 MHz)  $\delta$  21.30, 67.00, 77.28, 147.10 ppm.

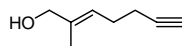

**(E)-2-Methyl-hepta-2-en-6-yn-1-ol.** In a flame-dried round-bottom flask was placed Mg turnings (0.72 g, 30 mmol) in THF (10 mL). The Mg turnings were activated with an  $\text{I}_2$  crystal and dibromoethane (0.1 mL). To this mixture was added a solution of 4-bromo-1-trimethylsilyl-1-butyne (3.05 g, 15 mmol) and anhydrous  $\text{ZnBr}_2$  (3.35 g, 15 mmol) in THF (40 mL). After the addition was completed, the reaction mixture was placed in an oil bath and heated at 55 °C for 6 h until GLC analysis indicated the complete consumption of the homopropargyl bromide. In another reaction flask was placed 3-iodo-2-methyl-1-propenol (1.98 g, 10 mmol) in THF (10 mL). It was treated with 1 equivalent of  $\text{EtZnBr}$  generated *in situ* from  $\text{EtMgBr}$  (10 mL, 10 mmol, 1 M in THF) and anhydrous  $\text{ZnBr}_2$ . After the mixture was stirred for 30 min at room temperature,  $\text{Pd(dppf)Cl}_2$  (400 mg, 0.55 mmol) and anhydrous DMF (20 mL) was added followed by the homopropargylzinc bromide generated above. The reaction mixture was stirred overnight and quenched with saturated  $\text{NH}_4\text{Cl}$ . After extracting the mixture with ether, the combined organic layers were dried over  $\text{MgSO}_4$ , filtered and concentrated. The crude product was treated with  $\text{K}_2\text{CO}_3$  in MeOH until GC analysis showed the complete disappearance of crude product. The reaction mixture was diluted with saturated  $\text{NH}_4\text{Cl}$  and extracted with ether. The combined organic layers were dried over  $\text{MgSO}_4$ , filtered and concentrated. Flash column chromatography on silica gel (90:10

hexanes:ethyl acetate) gave 0.92 g of the desired product in 74% over two steps:  $^1\text{H}$  NMR ( $\text{CDCl}_3$ , 300 MHz)  $\delta$  1.59 (s, 3 H), 1.91 (t,  $J$  = 2.4 Hz, 1 H), 2.1-2.3 (m, 4 H), 2.45 (bs, 1 H), 4.0 (s, 2 H), 5.42 (t,  $J$  = 6.9 Hz, 1 H);  $^{13}\text{C}$  NMR ( $\text{CDCl}_3$ , 75 MHz)  $\delta$  13.77, 18.62, 26.71, 68.46, 68.50, 84.22, 123.67, 136.46 ppm; LRMS (CI) for  $\text{C}_8\text{H}_{12}\text{O}$  ( $\text{M}^+$ ) calcd. 124, found 125 ( $\text{M}^+ + \text{H}$ ).

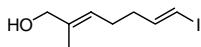

**(*E,E*)-7-Iodo-2-methy-2,6-heptadien-1-ol.** In a flame-dried flask under Ar was placed the alcohol obtained above (268 mg, 2.0 mmol) in THF (2 mL). DIBAL-H (0.36 mL, 2 mmol) was added via syringe slowly at 0 °C and the mixture was warmed to room temperature and stirred for 1 h. In another flame-dried flask covered with aluminum foil under Ar was placed  $\text{Cp}_2\text{ZrCl}_2$  (700 mg, 2.4 mmol) in THF (3 mL). To this mixture was added dropwise DIBAL-H (0.43 mL, 2.4 mmol) at 0 °C. After 30 min, the pretreated alcohol mixture was transferred via canula into the second reaction flask and the resultant mixture was stirred at room temperature for 2 h until all the solid dissolved. Then, it was treated with a solution of  $\text{I}_2$  (762 mg, 3.0 mmol) in THF (5 mL) at -78 °C. After stirring at 0 °C for 1 h, the reaction mixture was diluted with ether and quenched with saturated  $\text{NH}_4\text{Cl}$ . The reaction mixture was extracted with ether and the combined organic layers were washed sequentially with  $\text{Na}_2\text{S}_2\text{O}_3$ , brine, dried over  $\text{MgSO}_4$ , filtered and concentrated. Flash column chromatography on silica gel (90:10 hexanes:ethyl acetate) gave 370 mg of the desired product in 73% yield.

**2-Methyl-2,6-nonadien-8-yn-1-ol.** To a mixture of  $\text{ZnBr}_2$  (2.25 g, 10 mmol) in THF (20 mL) was added dropwise ethynylmagnesium bromide (20 mL, 10 mmol, 0.5 M in THF) via syringe. After 30 min, (*E,E*)-7-Iodo-2-methy-2,6-heptadien-1-ol (2.0 g, 8.0

mmol), which was pretreated with one equivalent of EtZnBr (10 mmol), DMF (10 mL) and Pd(PPh<sub>3</sub>)<sub>4</sub> (200 mg) were added sequentially. The reaction mixture was stirred for 5 h at room temperature and quenched with saturated NH<sub>4</sub>Cl. After extracting the mixture with ether, the organic layers were washed with brine, dried over MgSO<sub>4</sub>, filtered and concentrated. Flash column chromatography on silica gel (90:10 hexanes:ethyl acetate) afforded 1.0 g of the desired product in 84% yield: <sup>1</sup>H NMR (CDCl<sub>3</sub>, 300 MHz) δ 1.66 (s, 3 H), 2.1-2.25 (m, 4 H), 2.79 (d, *J* = 2.1 Hz, 1 H), 4.0 (s, 2 H), 5.35-5.55 (m, 2 H), 6.2-6.35 (m, 1 H); <sup>13</sup>C NMR (CDCl<sub>3</sub>, 75 MHz) δ 13.74, 26.65, 32.83, 68.72, 75.91, 82.42, 109.03, 124.51, 135.83, 145.96 ppm.

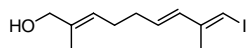

**(*E,E,E*)-2,8-Dimethyl-9-iodo-2,6,8-nonatrien-1-ol.** To a mixture of Cp<sub>2</sub>ZrCl<sub>2</sub> (584 mg, 2.0 mmol), Me<sub>3</sub>Al (0.6 mL, 6 mmol) in CH<sub>2</sub>Cl<sub>2</sub> (8 mL) was added at 0 °C the conjugated enyne obtained above (320 mg, 2.0 mmol). The mixture was warmed to room temperature and stirred overnight. The reaction mixture was cooled down to -78 °C and treated with a solution of I<sub>2</sub> (762 mg, 3.0 mmol) in THF (5 mL). The reaction vessel was placed in an ice-water bath and stirred for 1 h. The reaction was quenched with 3 N HCl and extracted with ether. The ether layers were combined and washed successively with Na<sub>2</sub>S<sub>2</sub>O<sub>3</sub>, brine, dried over MgSO<sub>4</sub>, filtered and concentrated. Flash column chromatography on silica gel (90:10 hexanes:ethyl acetate) gave 408 mg of the desired product in 70% yield: <sup>1</sup>H NMR (CDCl<sub>3</sub>, 300 MHz) δ 1.39 (bs, 1 H), 1.67 (s, 3 H), 1.94 (s, 3 H), 2.1-2.2 (m, 4 H), 4.0 (s, 2 H), 5.4 (bs, 1 H), 5.76 (dt, *J* = 6.4, 15.6 Hz, 1 H), 6.16 (d, *J* = 15.6 Hz, 1 H), 6.20 (s, 1 H); <sup>13</sup>C NMR (CDCl<sub>3</sub>, 75 MHz) δ 13.74, 20.17, 27.29, 32.60, 68.82, 81.40, 125.05, 130.75, 131.52, 135.46, 145.12 ppm.

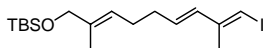

**(*E,E,E*)-9-*tert*-Butyldimethylsiloxy-1-iodo-2,8-dimethyl-1,3,7-nonatriene (2).**

To a mixture of the alcohol obtained above (292 mg, 1.0 mmol) in DMF (3 mL) were added imidazole (102 mg, 1.5 mmol) and TBSCl (180 mg, 1.2 mmol). The reaction mixture was stirred for 3 h, diluted with ether, and quenched with saturated  $\text{NH}_4\text{Cl}$ . After extracting the mixture with ether, the combined organic layers were washed with water, brine, dried over  $\text{MgSO}_4$ , filtered and concentrated. Flash column chromatography on silica gel (hexanes) gave 365 mg of the desired product in 90% yield;  $^1\text{H}$  NMR ( $\text{CDCl}_3$ , 300 MHz)  $\delta$  0.03 (s, 6 H), 0.89 (s, 9 H), 1.57 (s, 3 H), 1.91 (s, 3 H), 2.1-2.2 (m, 4 H), 3.99 (s, 2 H), 5.3-5.45 (m, 1 H), 5.7-5.8 (m, 1 H), 6.13 (d,  $J = 15.9$  Hz, 1 H), 6.16 (s, 1 H);  $^{13}\text{C}$  NMR ( $\text{CDCl}_3$ , 75 MHz)  $\delta$  -5.27 (2C), 13.49, 18.41, 20.14, 25.94 (3C), 27.18, 32.70, 68.43, 81.19, 123.34, 131.01, 131.41, 135.04, 145.16 ppm.

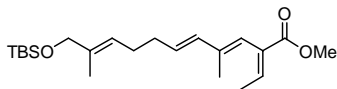

**Methyl (2*E*,3*E*,5*E*,9*E*)-2-Ethylidene-4,10-dimethyl-11-*tert*-butyldimethylsiloxy-3,5,9-undecatrienoate (10).** To a mixture of the vinyl iodide obtained above (406 mg, 1.0 mmol) in THF (3 mL) at  $-78^\circ\text{C}$  under Ar was added dropwise *t*-BuLi (1.7 M in pentane, 1.2 mL, 2.1 mmol). The mixture was stirred at  $-78^\circ\text{C}$  for 1 h, then a solution of anhydrous  $\text{ZnBr}_2$  (225 mg, 1.0 mmol) in THF (1 mL) was added via canula. The mixture was warmed to room temperature and stirred for 30 min. The volatiles were removed via vacuum and anhydrous DMF (4 mL) was added. In another flask were placed  $\text{Pd}_2(\text{dba})_3$  (23 mg, 0.025 mmol), TFP (23 mg, 0.1 mmol) in anhydrous DMF (2 mL). The mixture was stirred for 10 min until it turned clear. To this green solution were added methyl (*Z*)-2-iodo-2-butenate (249 mg, 1.1 mmol) followed

by the organozinc reagent generated above. The reaction was stirred for 3 h and quenched with saturated  $\text{NH}_4\text{Cl}$ . After extracting the mixture with ether, the organic layers were washed with brine, dried over  $\text{MgSO}_4$ , filtered and concentrated. Flash column chromatography on silica gel (95:5 hexanes:ethyl acetate) gave 282 mg of the desired product in 74% yield:  $^1\text{H}$  NMR ( $\text{CDCl}_3$ , 300 MHz)  $\delta$  0.05 (s, 6 H), 0.94 (s, 9 H), 1.65 (s, 3 H), 1.66 (s, 3 H), 1.75 (dd,  $J = 1.2, 7.1$  Hz, 3 H), 2.1-2.3 (m, 4 H), 3.76 (s, 3 H), 4.05 (bs, 2 H), 5.4-5.5 (m, 1 H), 5.78 (dt,  $J = 6.7, 15.6$  Hz, 1 H), 5.97 (s, 1 H), 6.25 (d,  $J = 15.6$  Hz, 1 H), 6.96 (q,  $J = 7.1$  Hz, 1 H);  $^{13}\text{C}$  NMR ( $\text{CDCl}_3$ , 75 MHz)  $\delta$  -5.29 (2C), 13.46, 14.34, 15.77, 18.39, 25.93 (3C), 27.46, 32.82, 51.77, 68.49, 122.08, 123.69, 130.16, 130.66, 134.17, 134.82, 139.04, 139.40, 167.95 ppm; HRMS for  $\text{C}_{22}\text{H}_{38}\text{O}_3\text{Si}$  ( $\text{M}^+$ ) calcd. 378.2590, found 378.2588.

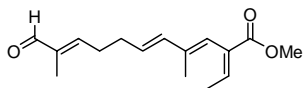

**Methyl (2E,3E,5E,9E)-2-Ethylidene-4,10-dimethyl-11-oxo-3,5,9-**

**undecatrienoate (9).**<sup>b</sup> To a solution of the compound obtained above (512 mg, 1.2 mmol) in THF (5 mL) was added TBAF (1 M in THF, 1.5 mL, 1.5 mmol) and AcOH (1.5 mmol). The reaction mixture was stirred at room temperature for 20 h and quenched with saturated  $\text{NH}_4\text{Cl}$ . After extracting the mixture with ether, the organic layers were washed with brine, dried over  $\text{MgSO}_4$ , filtered and concentrated. Flash column chromatography on silica gel (95:5 hexanes:ethyl acetate) gave 310 mg of the desired product in 87% yield.

To a solution of the compound obtained above (255 mg, 0.96 mmol) in hexanes (5 mL) was added activated  $\text{MnO}_2$  (1.26 g 14.5 mmol). The mixture was vigorously stirred until TLC analysis showed the complete disappearance of the starting material. The



mixture was filtered and concentrated. Flash column chromatography on silica gel (95:5 hexanes:ethyl acetate) gave 210 mg of the desired product in 83% yield:  $^1\text{H}$  NMR ( $\text{CDCl}_3$ , 300 MHz)  $\delta$  1.64 (d,  $J = 1.2$  Hz, 3 H), 1.72 (dd,  $J = 1.2, 7.0$  Hz, 3 H), 1.76 (s, 3 H), 2.3-2.45 (m, 2 H), 2.45-2.6 (m, 2 H), 3.73 (m, 3 H), 5.72 (dt,  $J = 6.5, 15.8$  Hz, 1 H), 5.98 (s, 1 H), 6.26 (d,  $J = 15.8$  Hz, 1 H), 6.54 (dt,  $J = 1.1, 7.7$  Hz, 1 H), 6.95 (q,  $J = 7.0$  Hz, 1 H), 9.42 (s, 1 H);  $^{13}\text{C}$  NMR ( $\text{CDCl}_3$ , 75 MHz)  $\delta$  8.89, 14.03, 15.46, 28.49, 31.18, 51.43, 122.68, 127.98, 130.14, 134.86 (2C), 137.27, 153.19, 167.31, 194.71 ppm; IR 2983, 2849, 2850, 1716, 1687, 1641, 1435  $\text{cm}^{-1}$ ; HRMS for  $\text{C}_{16}\text{H}_{22}\text{O}_3$  ( $\text{M}^+$ ) calcd. 262.1569, found 262.1568.

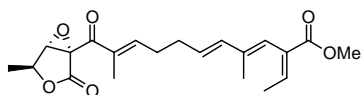

**(1R,4S,5R)-4-methyl-1-[(2E,6E,8E,10E)-2,8-dimethyl-10-methoxycarbonyl-1-oxododeca-2,6,10-trienyl]-3,6-dioxabicyclo[3.1.0]hexan-2-one (11):**<sup>b</sup> To a solution of **9** (132 mg, 0.5 mmol), TBAF (0.08 mmol, 15 mol%, pretreated with dry MS4A (1g/mmol)) and activated MS4A (0.5 g) in THF/hexane (1:1, 1 mL) at room temperature was added a solution of **4** (186 mg, 1.0 mmol) in THF (1.5 mL) slowly using a syringe pump in 12 h. After 36 h, the reaction mixture was diluted with EtOAc, filtered through a celite pad and concentrated. The crude product was treated with 3% HF in 3 mL of  $\text{CH}_3\text{CN}$  for 30 min. After the mixture was quenched with  $\text{NaHCO}_3$ , extracted with EtOAc, The combined organic layers were dried over  $\text{MgSO}_4$ , filtered and concentrated. The residue was purified via column chromatography (silica gel, 20-30% EtOAc:hexanes) and the reaction was repeated by using the recovered **9**. The combined amount of the desired aldol adduct isolated is 81 mg.

To a solution of DMSO (101  $\mu$ L, 0.65 mmol) in  $\text{CH}_2\text{Cl}_2$  (1 mL) was added TFAA (93  $\mu$ L, 0.13 mmol) at  $-78^\circ\text{C}$ . After 30 min, a solution of the compound obtained above in  $\text{CH}_2\text{Cl}_2$  (1 mL) was added via canula. After 3 h at  $-78^\circ\text{C}$ ,  $\text{Et}_3\text{N}$  (0.31 mL, 2.2 mmol) was added and the mixture was warmed to rt and stirred for 1 h. The reaction mixture was quenched with water and extracted with  $\text{CH}_2\text{Cl}_2$ . the combined organic layers were washed with brine, dried over  $\text{MgSO}_4$ , filtered and concentrated. The residue was purified via column chromatography (silica gel, 2:1 ethyl acetate:hexane) to give **11** (72 mg, 39% overall) as a pale yellow oil:  $[\alpha]_{\text{D}}^{23} -2.4^\circ$  (c 1.2  $\text{CHCl}_3$ );  $^1\text{H}$  NMR ( $\text{CDCl}_3$ , 300 MHz)  $\delta$  1.50 (d,  $J = 7.0$  Hz, 3 H), 1.62 (d,  $J = 1.2$  Hz, 3 H), 1.73 (dd,  $J = 1.2, 7.0$  Hz, 3 H), 1.87 (s, 3 H), 2.3-2.4 (m, 2 H), 2.45-2.55 (m, 2 H), 3.73 (s, 3 H), 4.09 (s, 1 H), 4.71 (q,  $J = 7.0$  Hz, 1 H), 5.72 (dt,  $J = 6.5$  Hz, 15.8 Hz, 1 H), 5.97 (s, 1 H), 6.26 (d,  $J = 15.8$ , 1 H), 6.88 (t,  $J = 5.8$  Hz, 1 H), 6.94 (q,  $J = 7.0$  Hz, 1 H);  $^{13}\text{C}$  NMR ( $\text{CDCl}_3$ , 75 MHz)  $\delta$  11.14, 14.28, 15.77, 17.77, 29.22, 31.30, 51.76, 60.24, 64.03, 75.48, 123.04, 127.98, 130.34, 135.42, 135.98, 137.55, 139.69, 149.37, 167.73, 168.27, 188.20 ppm; IR 2852, 1782, 1713, 1680, 1637, 1435  $\text{cm}^{-1}$ ; HRMS for  $\text{C}_{21}\text{H}_{26}\text{O}_6$  ( $\text{M}^+$ ) calcd. 374.1729, found 374.1732.

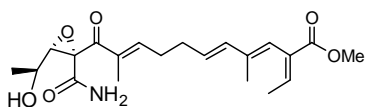

**Methyl (3E,5E,9E,12R,13R,14S)-12-carbamoyl-12,13-epoxy-2-[(E)-ethylidene]-4,10-dimethyl-14-hydroxy-11-oxopentadeca-3,5,9-trienoate.** To a solution of compound **11** obtained above (38 mg, 0.1 mmol) in 0.5 mL of methanol at  $0^\circ\text{C}$  was added  $\text{NH}_3$  (2 mL, 8 M in methanol). After 30 min, the volatile was removed via vacua and the residue was purified through column chromatography (silica gel, 60:40,

ethyl acetate:hexanes) to give 34 mg of the desired product in 87% yield:  $[\alpha]_D^{23} -55^\circ$  (c 0.6  $\text{CHCl}_3$ );  $^1\text{H}$  NMR ( $\text{CDCl}_3$ , 300 MHz)  $\delta$  1.37 (d,  $J = 6.5$  Hz, 3 H), 1.62 (s, 3 H), 1.73 (d,  $J = 7.0$  Hz, 3 H), 1.80 (s, 3 H), 2.3-2.5 (m, 4 H), 3.18 (d,  $J = 7.6$  Hz, 1 H), 3.67 (bs, 1 H), 3.73 (bs, 4 H), 5.72 (dt,  $J = 6.5, 15.8$  Hz, 1 H), 5.95 (s, 1 H), 6.24 (d,  $J = 15.8$  Hz, 1 H), 6.62 (bs, 2 H), 6.95 (q,  $J = 7.0$  Hz, 1 H), 7.09 (t,  $J = 7.0$  Hz, 1 H);  $^{13}\text{C}$  NMR ( $\text{CDCl}_3$ , 75 MHz)  $\delta$  11.20, 14.23, 15.77, 20.24, 28.94, 31.30, 51.87, 65.04, 65.40, 65.99, 122.76, 128.32, 130.28, 134.92, 135.37, 138.06, 139.86, 149.74, 167.59, 167.87, 192.92 ppm; IR 3460, 3344, 2978, 2951, 2929, 2854, 1689, 1635, 1599  $\text{cm}^{-1}$ ; HRMS for  $\text{C}_{21}\text{H}_{29}\text{NO}_6$  ( $\text{M}^+$ ) calcd. 391.1995, found 391.1997.

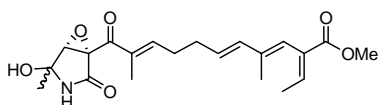

**(+)-Epolactaene (1):**<sup>b,c</sup> To 110 mg (0.25 mmol) of Dess-Martin reagent in 2 mL of  $\text{CH}_2\text{Cl}_2$  was added 0.5 mL of pyridine. After 0.5 h, 27 mg (0.07 mmol) of the compound obtained above in  $\text{CH}_2\text{Cl}_2$  (0.5 mL) was added and the reaction was stirred until TLC showed the consumption of the starting material (2 h). After diluting the mixture with ether, a saturated solution of  $\text{Na}_2\text{S}_2\text{O}_3$  was added and the mixture was stirred for 0.5 h. The layers were separated, and the aqueous phase was extracted with EtOAc. The combined organic phases were dried over  $\text{MgSO}_4$ , concentrated, and purified by column chromatography (30:70, hexanes:EtOAc) to give 19 mg (70%) of the desired aldehyde: dr = 1.8/1;  $[\alpha]_D^{23} +36.3^\circ$  (c 0.38 MeOH) lit.<sup>1</sup>  $[\alpha]_D^{22} +32^\circ$  (c 0.1 MeOH);  $^1\text{H}$  NMR ( $\text{CD}_3\text{OD}$ , 300 MHz)  $\delta$  1.60 (s, 2 H), [minor isomer 1.64 (s, 1 H)], 1.69 (s, 3 H), 1.80 (d,  $J = 7.0$  Hz, 3 H), 1.91 (s, 3 H), 2.35-2.5 (m, 2 H), 2.5-2.7 (m, 2 H), 3.79 (s, 2 H), [minor isomer 3.80 (s, 1 H)], 4.06 (s, 0.66 H), [minor isomer 4.14 (s, 0.33 H)], 4.92 (s, 1

H), 5.86 (dt,  $J = 6.4, 15.8$  Hz, 1 H), 6.03 (s, 1 H), 6.36 (d,  $J = 15.8$  Hz, 0.66 H), [minor isomer 6.33 (d,  $J = 15.8$  Hz, 0.33 H)], 6.9-7.1 (m, 1 H), 7.10 (dt,  $J = 1.1, 7.0$  Hz, 0.66 H), [minor isomer 6.80 (t,  $J = 6.7$  Hz, 0.33 H) ppm;  $^{13}\text{C}$  NMR ( $\text{CD}_3\text{OD}$ , 75 MHz)  $\delta$  11.29, 14.75, 16.15, 22.38, 25.64, 29.82, 30.30, 31.06, 32.70, 52.53, 64.10, 64.86, 65.34, 66.21, 84.20, 84.87, 123.81, 124.18, 129.85, 131.90, 132.01, 136.73, 136.84, 137.40, 139.53, 139.76, 140.99, 141.16, 149.22, 150.20, 169.57, 169.68, 170.38, 172.32, 191.86, 192.22 ppm; IR 3440, 3315, 2950, 2925, 1720, 1682, 1633  $\text{cm}^{-1}$ ; HRMS for  $\text{C}_{21}\text{H}_{27}\text{NO}_6$  ( $\text{M}^+$ ) calcd. 389.1838, found 389.1844.

## Reference

- (a) Sato, F.; Ishikawa, H.; Watanabe, H.; Miyake, T.; Sato, M. *J. Chem. Soc., Chem. Commun.* **1981**, 718.
- (b) Kuramochi, K.; Nagata, S.; Itaya, H.; Takao, K.; Kobayashi, S. *Tetrahedron Lett.* **1999**, 40, 7367. (b) Kuramochi, K.; Nagata, S.; Itaya, H.; Takao, K.; Kobayashi, S. *Tetrahedron Lett.* **1999**, 40, 7371.
- (c) Kuramochi, K.; Nagata, H.; Matsubara, Y.; Sunoki, T.; Uchiro, H.; Takao, K.; Kobayashi, S. *Tetrahedron* **2003**, 59, 9743.
- (c) (a) Hayashi, Y. ; Narasaka, K. *Chem. Lett.* **1998**, 313. (b) Hayashi, Y.; Kanayama, J.; Yamaguchi, J.; Shoji, M. *J. Org. Chem.* **2002**, 67, 9443.
- (d) Liu, F.; Negishi, E. *J. Org. Chem.*, **1997**, 62, 8591.

# Selective Synthesis of Epolactaene Featuring Efficient.... Ze Tan and Ei-ichi Negishi\*

| INDEX | FREQUENCY PPM | HEIGHT |
|-------|---------------|--------|
| 1     | 2265.169      | 7.352  |
| 2     | 2100.719      | 7.320  |
| 3     | 2131.685      | 7.387  |
| 4     | 2183.241      | 7.286  |
| 5     | 1140.519      | 2.822  |
| 6     | 593.219       | 1.944  |
| 7     | 500.198       | 1.991  |
| 8     | 0.000         | 8.000  |

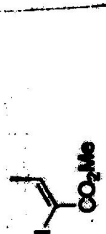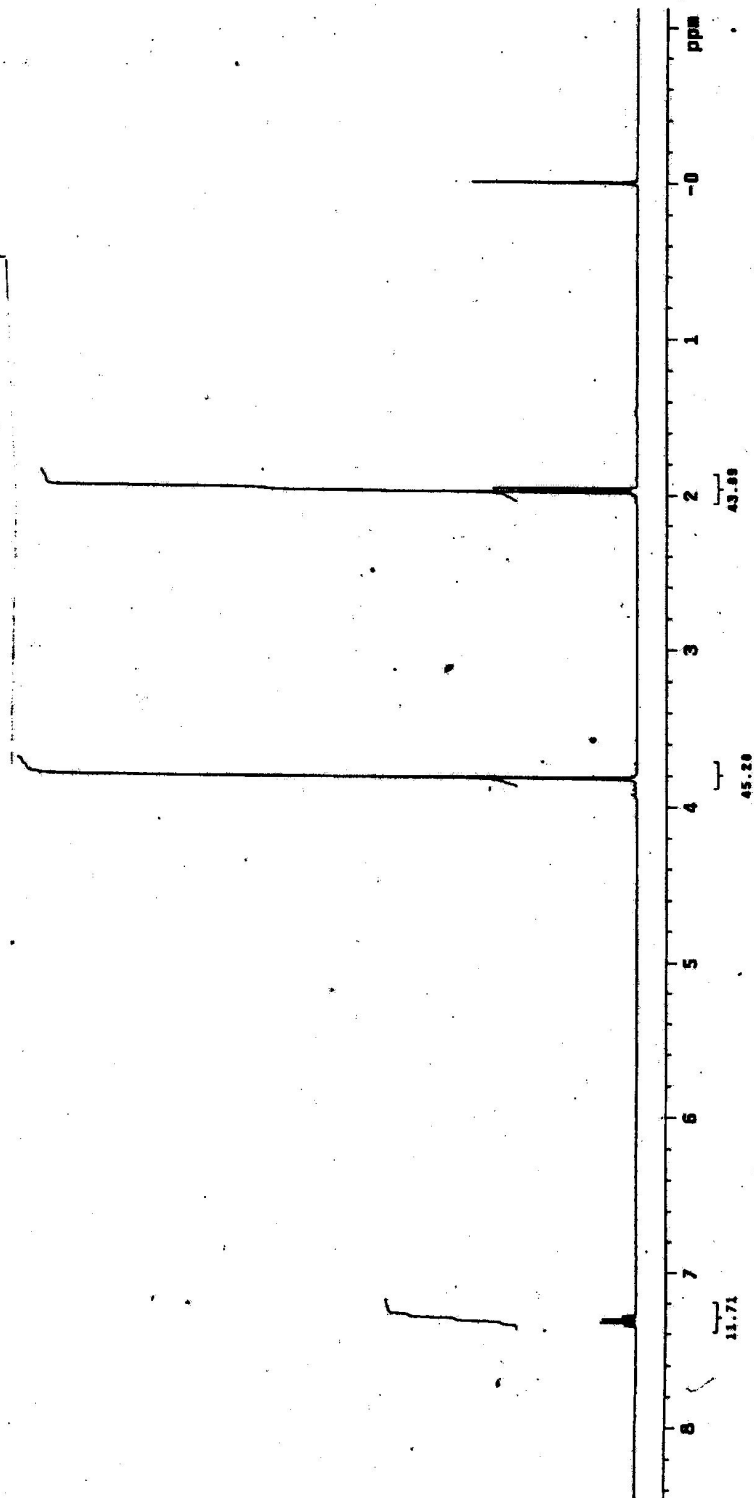

| INDEX | FREQUENCY | PPM     | HEIGHT |
|-------|-----------|---------|--------|
| 1     | 12386.142 | 103.157 | 14.4   |
| 2     | 11213.544 | 149.871 | 59.1   |
| 3     | 7282.769  | 95.993  | 11.4   |
| 4     | 5839.435  | 77.421  | 13.9   |
| 5     | 5897.724  | 77.989  | 13.1   |
| 6     | 5775.982  | 76.379  | 12.4   |
| 7     | 4322.723  | 93.324  | 49.5   |
| 8     | 1723.188  | 57.848  | 39.4   |
| 9     | -8.879    | -9.118  | 15.3   |

# Selective Synthesis of Epolactaene Featuring Efficient..... Ze Tan and Ei-ichi Negishi\*

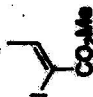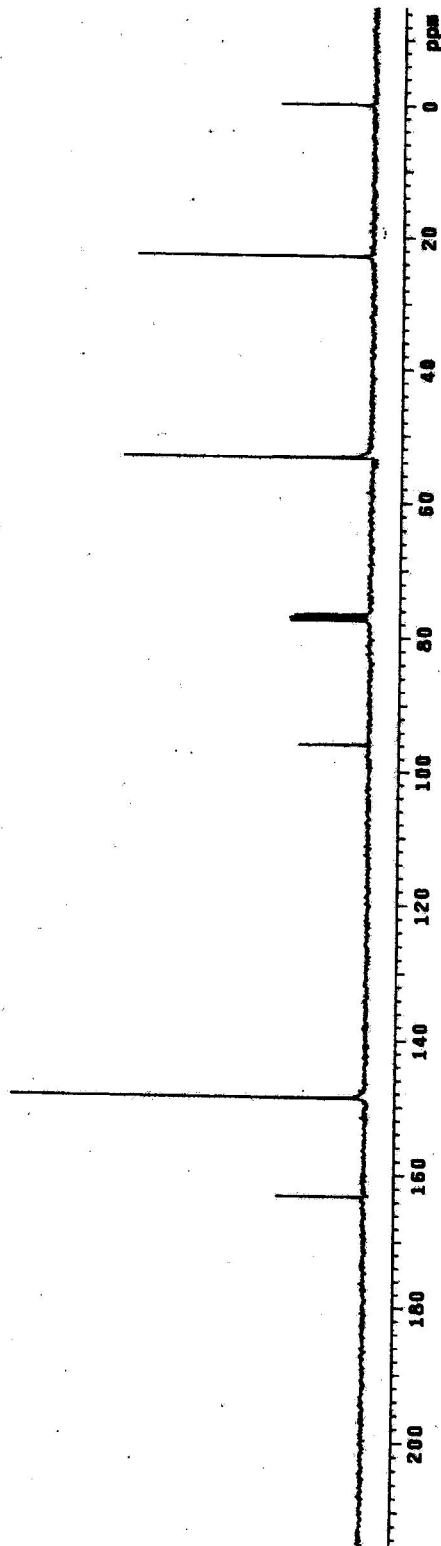

# Selective Synthesis of Epolactaene Featuring Efficient.... Ze Tan and Ei-ichi Negishi\*

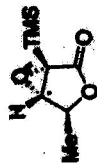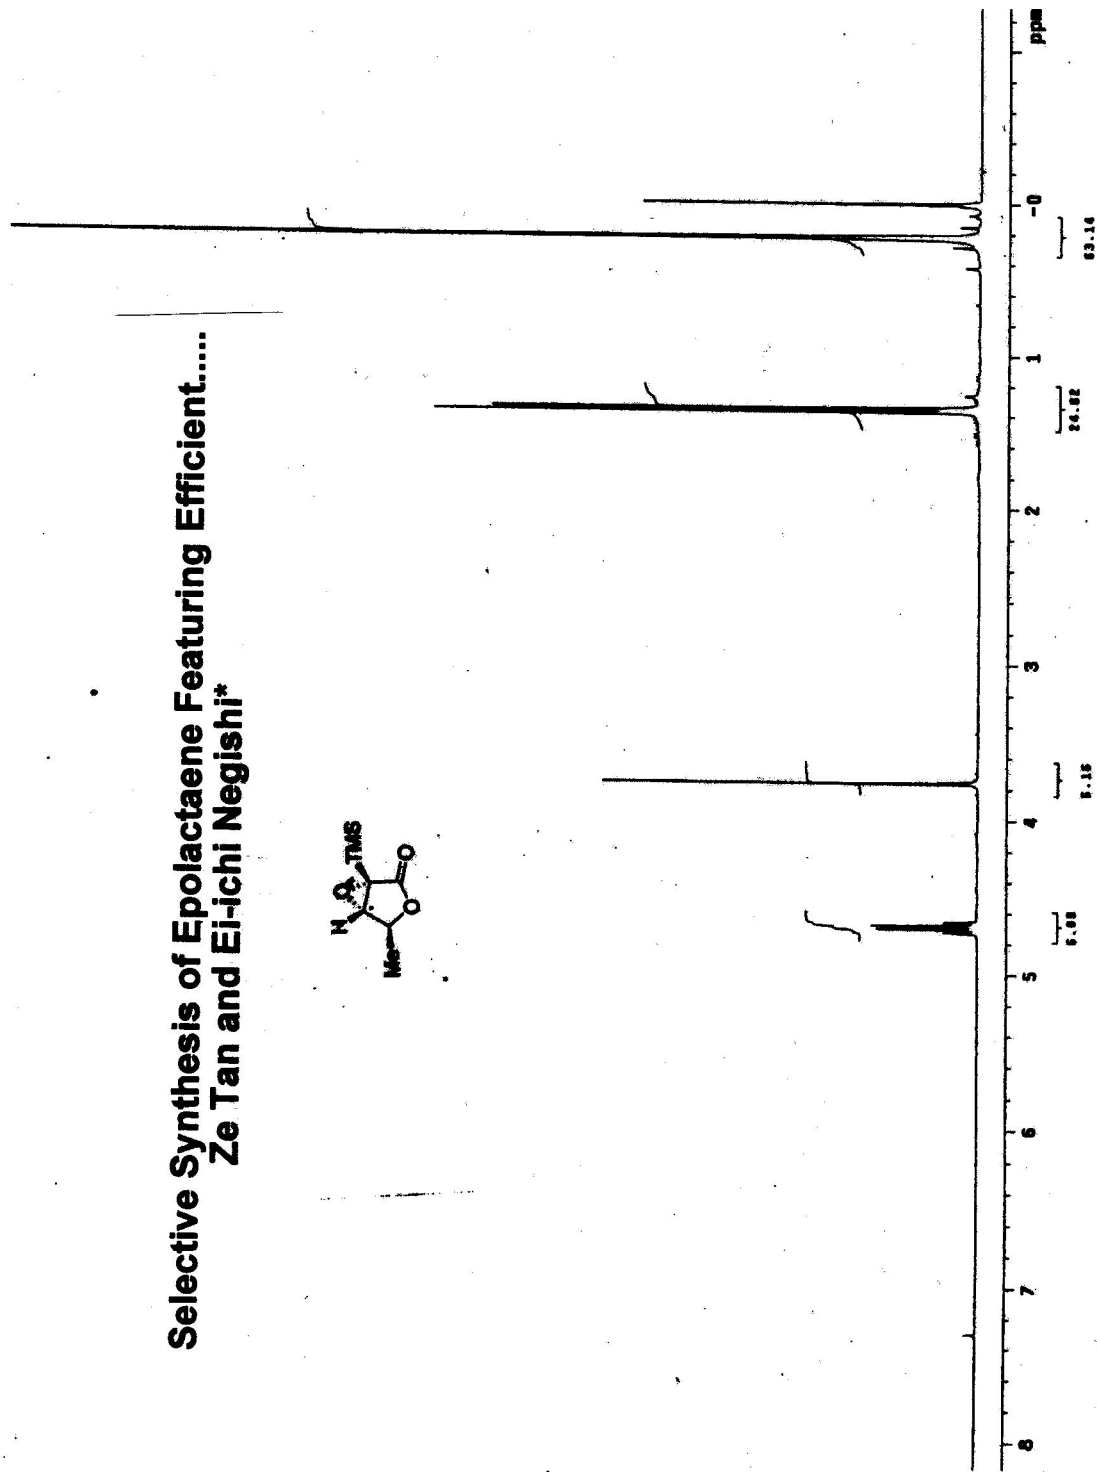

| INDEX | FREQUENCY | PPM     | HEIGHT |
|-------|-----------|---------|--------|
| 1     | 13076.489 | 179.376 | 12.6   |
| 2     | 6039.485  | 77.421  | 15.3   |
| 3     | 6007.713  | 77.000  | 16.5   |
| 4     | 3775.942  | 76.579  | 16.7   |
| 5     | 5665.855  | 75.119  | 44.9   |
| 6     | 4776.521  | 63.326  | 49.6   |
| 7     | 3603.589  | 61.822  | 11.3   |
| 8     | 1364.751  | 17.982  | 56.6   |
| 9     | -8.878    | -8.118  | 6.3    |
| 10    | -298.868  | -3.564  | 48.5   |

# Selective Synthesis of Epolactaene Featuring Efficient..... Ze Tan and Ei-ichi Negishi\*

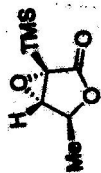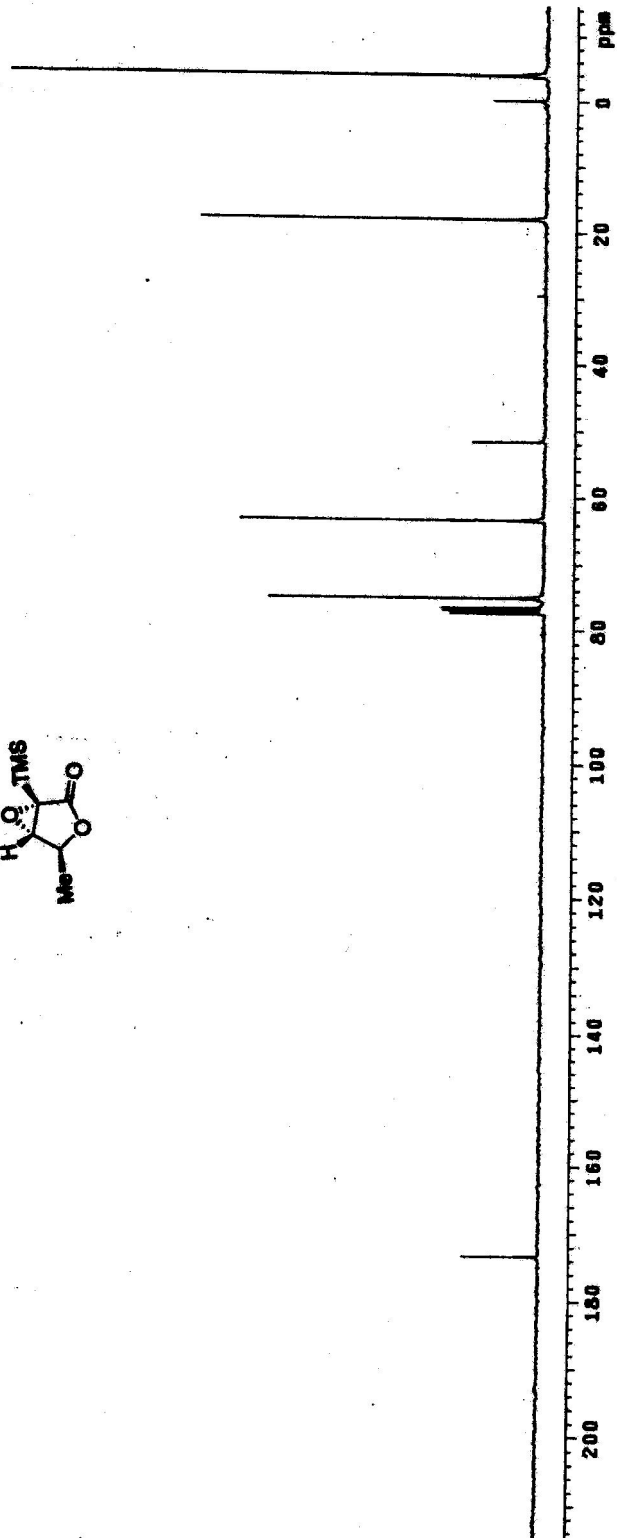



| INDEX | FREQUENCY PPM | HEIGHT | INDEX | FREQUENCY PPM | HEIGHT |
|-------|---------------|--------|-------|---------------|--------|
| 1     | 2240.825      | 7.284  | 40    | -2.698        | -0.918 |
| 2     | 1647.308      | 5.492  | 41    | -3.357        | -0.911 |
| 3     | 1646.168      | 5.483  |       |               |        |
| 4     | 1644.798      | 5.483  |       |               |        |
| 5     | 1643.117      | 5.478  |       |               |        |
| 6     | 1641.743      | 5.478  |       |               |        |
| 7     | 1640.322      | 5.469  |       |               |        |
| 8     | 1639.149      | 5.465  |       |               |        |
| 9     | 1637.928      | 5.460  |       |               |        |
| 10    | 1634.724      | 5.448  |       |               |        |
| 11    | 1633.593      | 5.440  |       |               |        |
| 12    | 1291.914      | 6.085  |       |               |        |
| 13    | 1112.786      | 3.718  |       |               |        |
| 14    | 1105.846      | 3.686  |       |               |        |
| 15    | 893.529       | 8.312  |       |               |        |
| 16    | 884.820       | 2.298  |       |               |        |
| 17    | 887.887       | 2.293  |       |               |        |
| 18    | 683.846       | 2.278  |       |               |        |
| 19    | 681.841       | 2.272  |       |               |        |
| 20    | 686.716       | 2.269  |       |               |        |
| 21    | 877.633       | 2.257  |       |               |        |
| 22    | 674.681       | 2.247  |       |               |        |
| 23    | 871.497       | 2.230  |       |               |        |
| 24    | 867.287       | 2.225  |       |               |        |
| 25    | 664.541       | 2.215  |       |               |        |
| 26    | 661.164       | 2.204  |       |               |        |
| 27    | 819.278       | 2.205  |       |               |        |
| 28    | 832.650       | 1.976  |       |               |        |
| 29    | 809.483       | 1.955  |       |               |        |
| 30    | 847.924       | 1.937  |       |               |        |
| 31    | 604.813       | 1.640  |       |               |        |
| 32    | 498.894       | 1.627  |       |               |        |
| 33    | 375.878       | 1.251  |       |               |        |
| 34    | 378.009       | 1.236  |       |               |        |
| 35    | 368.356       | 1.128  |       |               |        |
| 36    | 361.238       | 1.105  |       |               |        |
| 37    | 299.231       | 0.968  |       |               |        |
| 38    | 2.441         | 0.606  |       |               |        |
| 39    | 0.608         | 0.908  |       |               |        |

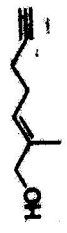

# Selective Synthesis of Epolactaene Featuring Efficient.... Ze Tan and Ei-ichi Negishi\*

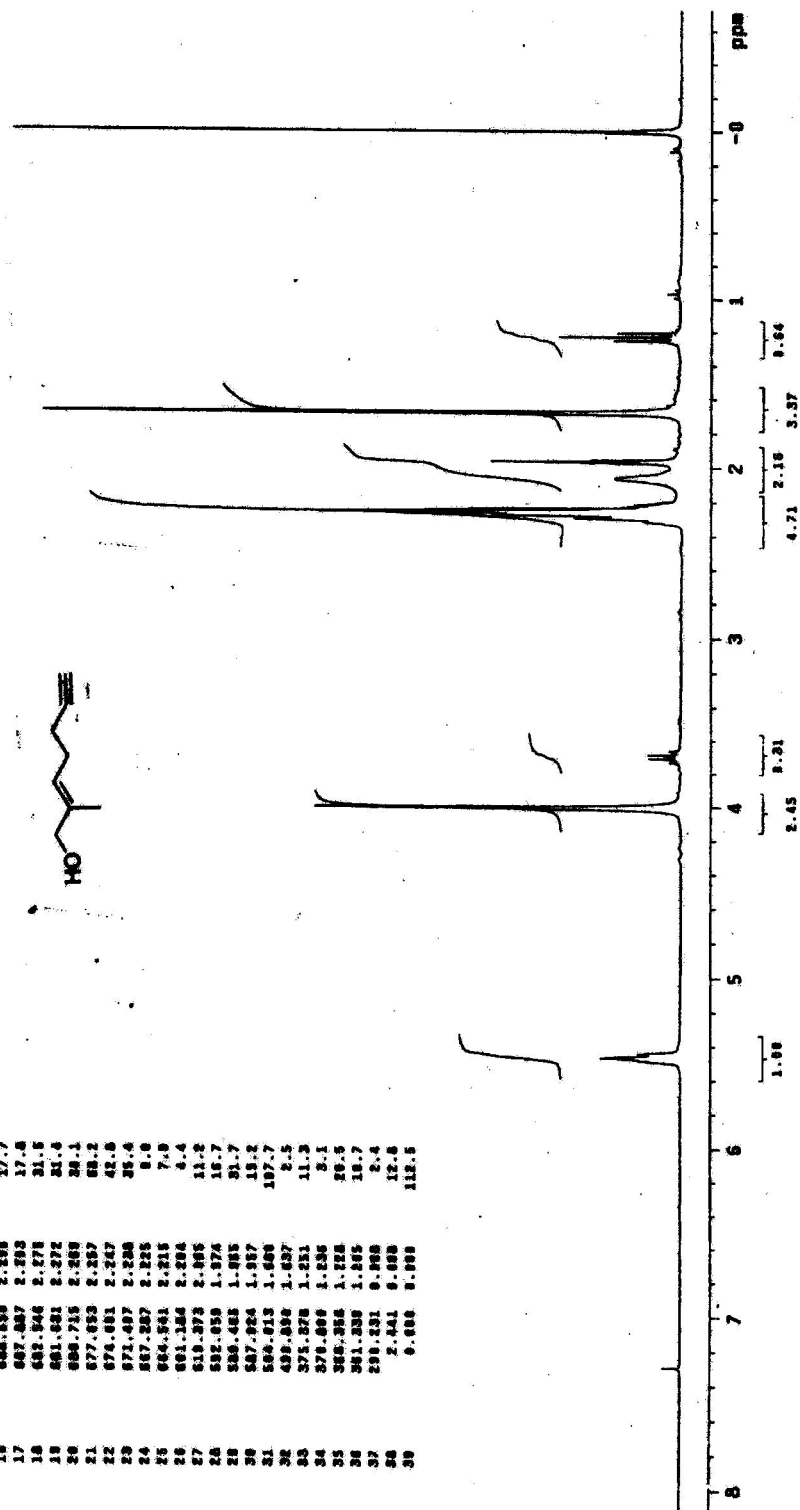

**Selective Synthesis of Epolactone Featuring Efficient.....  
Ze Tan and Ei-ichi Negishi\***

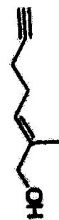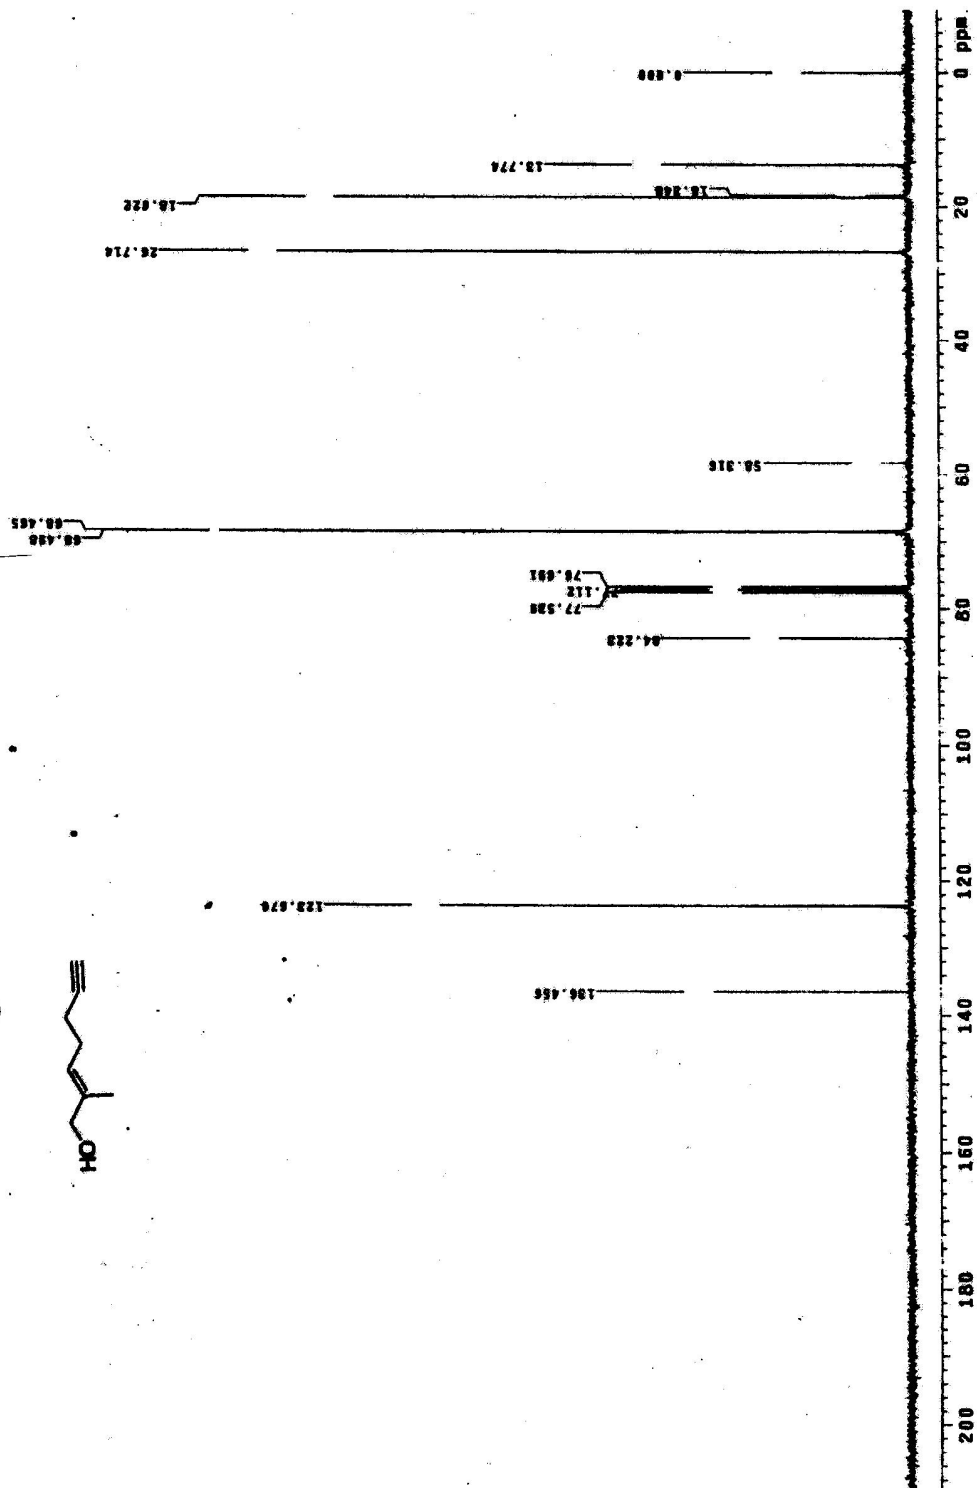

| INDEX | FREQUENCY | PPM | HEIGHT |
|-------|-----------|-----|--------|
| 1     | 51.04     | 201 | 7.428  |
| 2     | 1093      | 248 | 8.138  |
| 3     | 1093      | 248 | 8.138  |
| 4     | 1093      | 248 | 8.138  |
| 5     | 1743      | 326 | 5.015  |
| 6     | 1743      | 326 | 5.015  |
| 7     | 1743      | 326 | 5.015  |
| 8     | 1743      | 326 | 5.015  |
| 9     | 1743      | 326 | 5.015  |
| 10    | 1743      | 326 | 5.015  |
| 11    | 1743      | 326 | 5.015  |
| 12    | 1743      | 326 | 5.015  |
| 13    | 1743      | 326 | 5.015  |
| 14    | 1743      | 326 | 5.015  |
| 15    | 1743      | 326 | 5.015  |
| 16    | 1743      | 326 | 5.015  |
| 17    | 1743      | 326 | 5.015  |
| 18    | 1743      | 326 | 5.015  |
| 19    | 1743      | 326 | 5.015  |
| 20    | 1743      | 326 | 5.015  |
| 21    | 1743      | 326 | 5.015  |
| 22    | 1743      | 326 | 5.015  |
| 23    | 1743      | 326 | 5.015  |
| 24    | 1743      | 326 | 5.015  |
| 25    | 1743      | 326 | 5.015  |
| 26    | 1743      | 326 | 5.015  |
| 27    | 1743      | 326 | 5.015  |
| 28    | 1743      | 326 | 5.015  |

# Selective Synthesis of Epolactaene Featuring Efficient..... Ze Tan and Ei-ichi Negishi\*

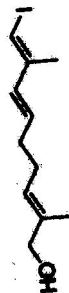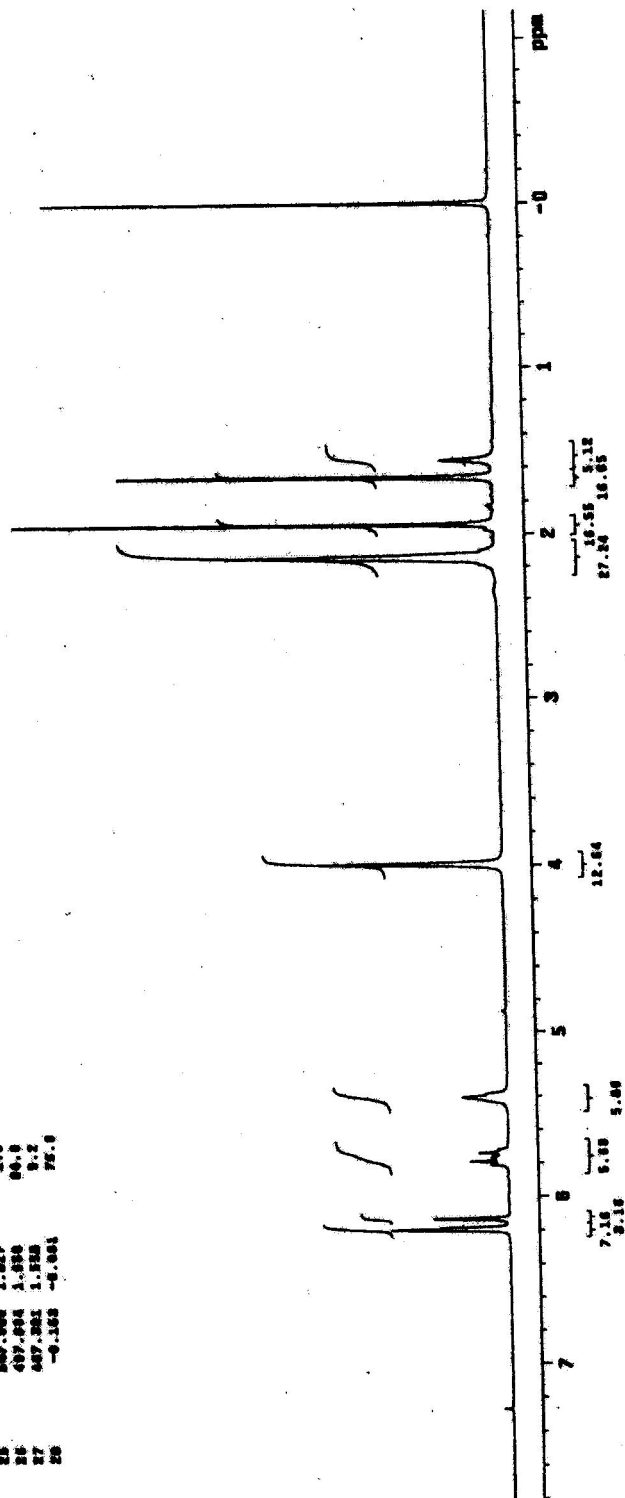

# Selective Synthesis of Epoxideane Featuring Efficient.....

## Ze Tan and Ei-ichi Negishi\*

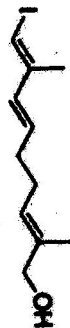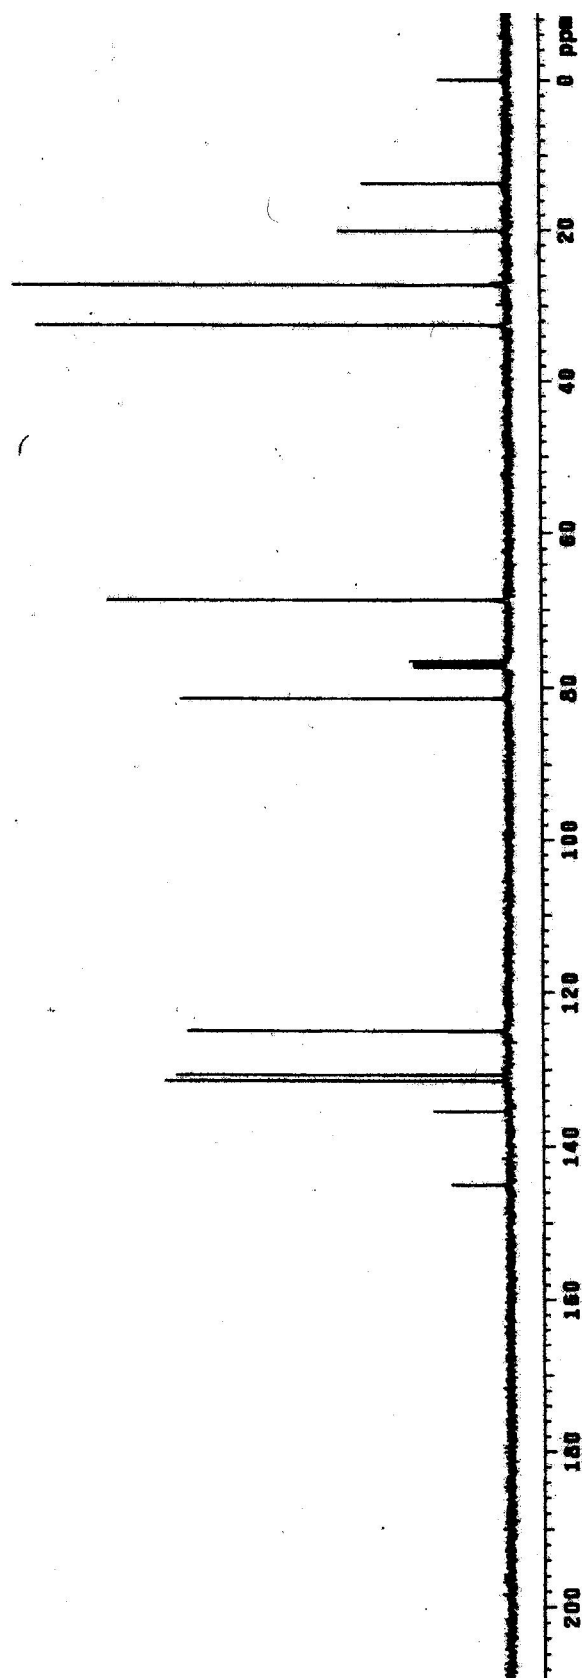

# Selective Synthesis of Epolactaene Featuring Efficient..... Ze Tan and Ei-ichi Negishi\*

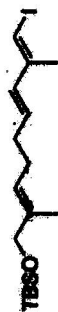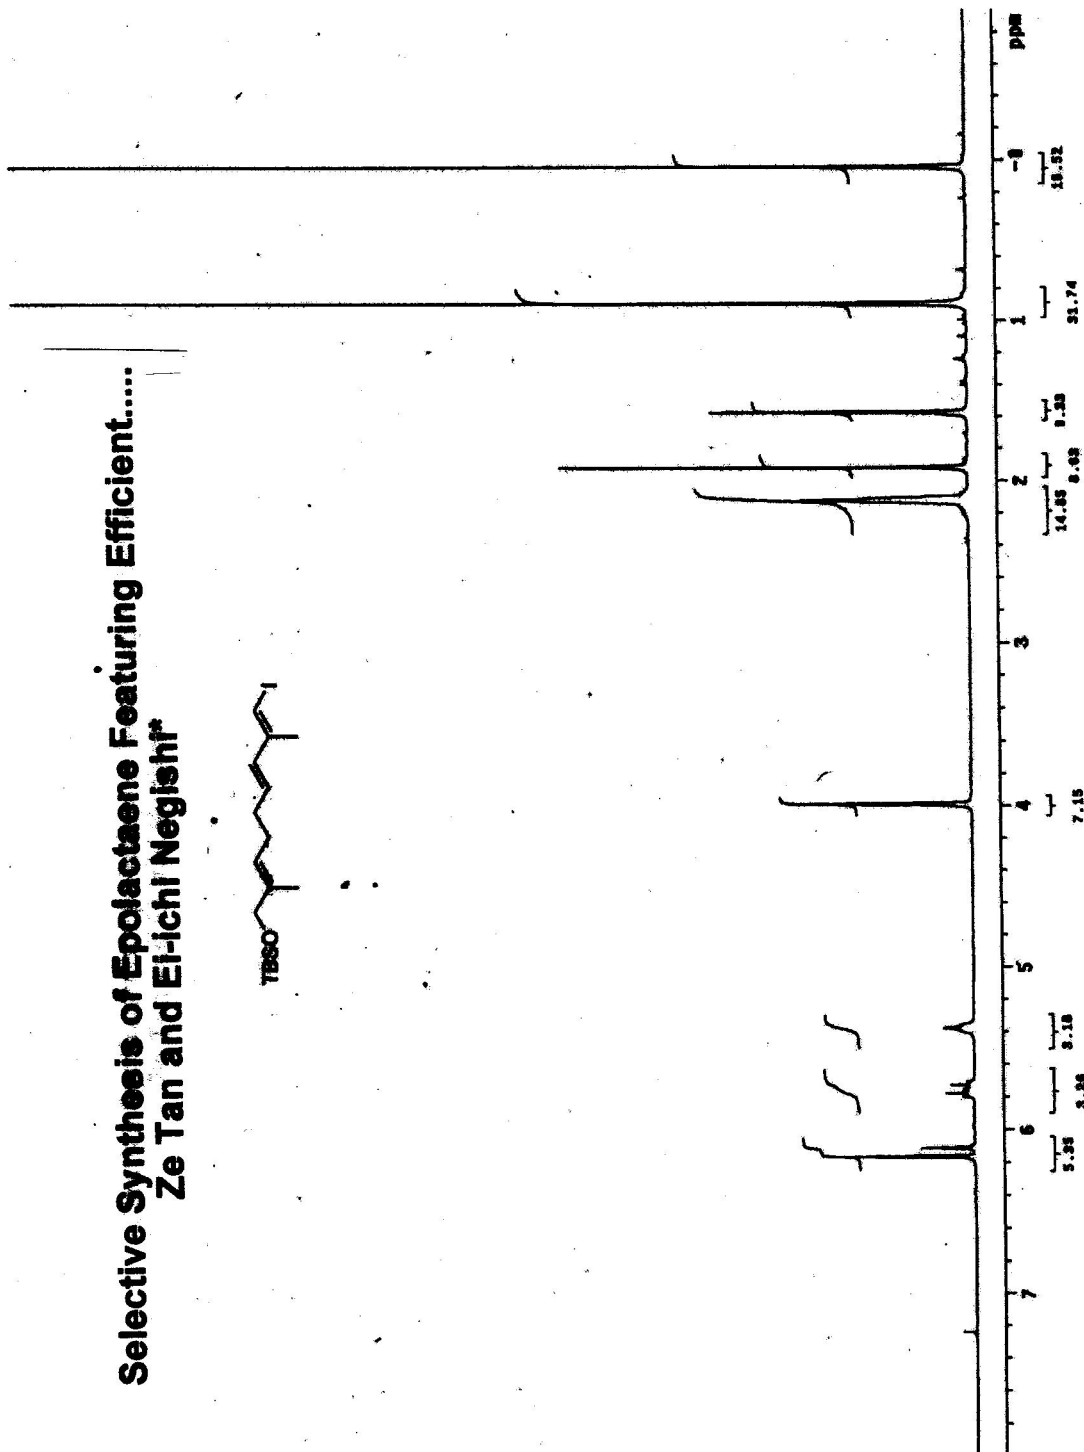

CC1=CC=C(C=C1)C=CC=CC=C1

CC(C)=CC/C=C/C/C=C/C(C)=C/C=C/C(=C)C(C)C(=O)OC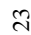

COC(=O)C=C(C)C/C=C\C/C=C\CC(C)=CCTBS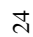



**Selective Synthesis of Epolactone Featuring Efficient.....  
Ze Tan and Ei-ichi Negishi\***

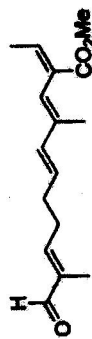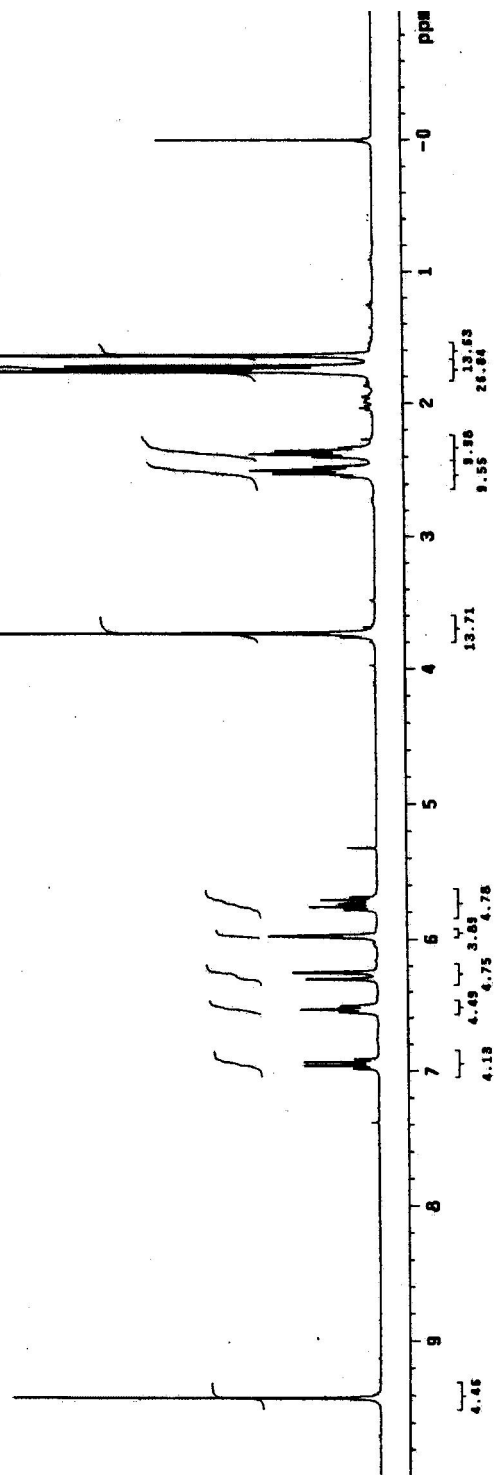

# Selective Synthesis of Epolactaone Featuring Efficient....

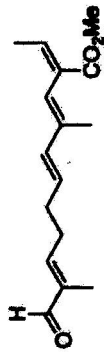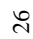



| INDEX | FREQUENCY | PPM     | HEIGHT |
|-------|-----------|---------|--------|
| 1     | 14194.898 | 100.199 | 8.4    |
| 2     | 12891.515 | 100.267 | 8.0    |
| 3     | 12851.204 | 107.793 | 8.4    |
| 4     | 11266.428 | 148.373 | 35.4   |
| 5     | 10825.893 | 139.600 | 39.0   |
| 6     | 10875.898 | 137.554 | 15.1   |
| 7     | 10856.491 | 135.082 | 16.8   |
| 8     | 10714.112 | 135.421 | 39.6   |
| 9     | 8830.856  | 130.340 | 14.8   |
| 10    | 8252.391  | 127.061 | 34.1   |
| 11    | 9208.582  | 123.040 | 38.9   |
| 12    | 5838.485  | 77.421  | 52.5   |
| 13    | 5067.723  | 77.000  | 51.4   |
| 14    | 5776.802  | 75.578  | 49.1   |
| 15    | 5093.382  | 75.484  | 38.7   |
| 16    | 4825.467  | 84.030  | 36.7   |
| 17    | 4543.613  | 89.540  | 19.0   |
| 18    | 3884.147  | 51.762  | 32.9   |
| 19    | 2369.534  | 31.498  | 43.7   |
| 20    | 2269.844  | 29.218  | 35.1   |
| 21    | 1939.929  | 17.795  | 40.2   |
| 22    | 1180.501  | 15.772  | 30.4   |
| 23    | 1077.267  | 14.284  | 28.6   |
| 24    | 849.213   | 11.140  | 28.9   |
| 25    | -5.702    | -0.000  | 37.2   |

# Selective Synthesis of Epolactaene Featuring Efficient..... Ze Tan and Ei-ichi Negishi\*

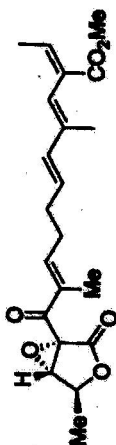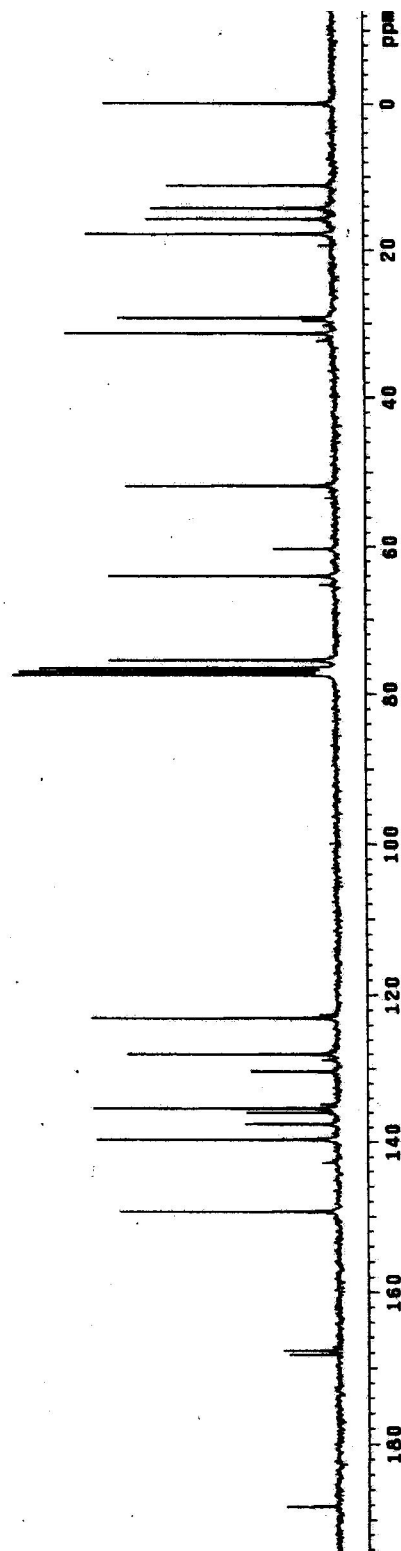

# Selective Synthesis of Epolactaene Featuring Efficient..... Ze Tan and Ei-ichi Negishi\*

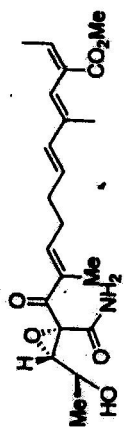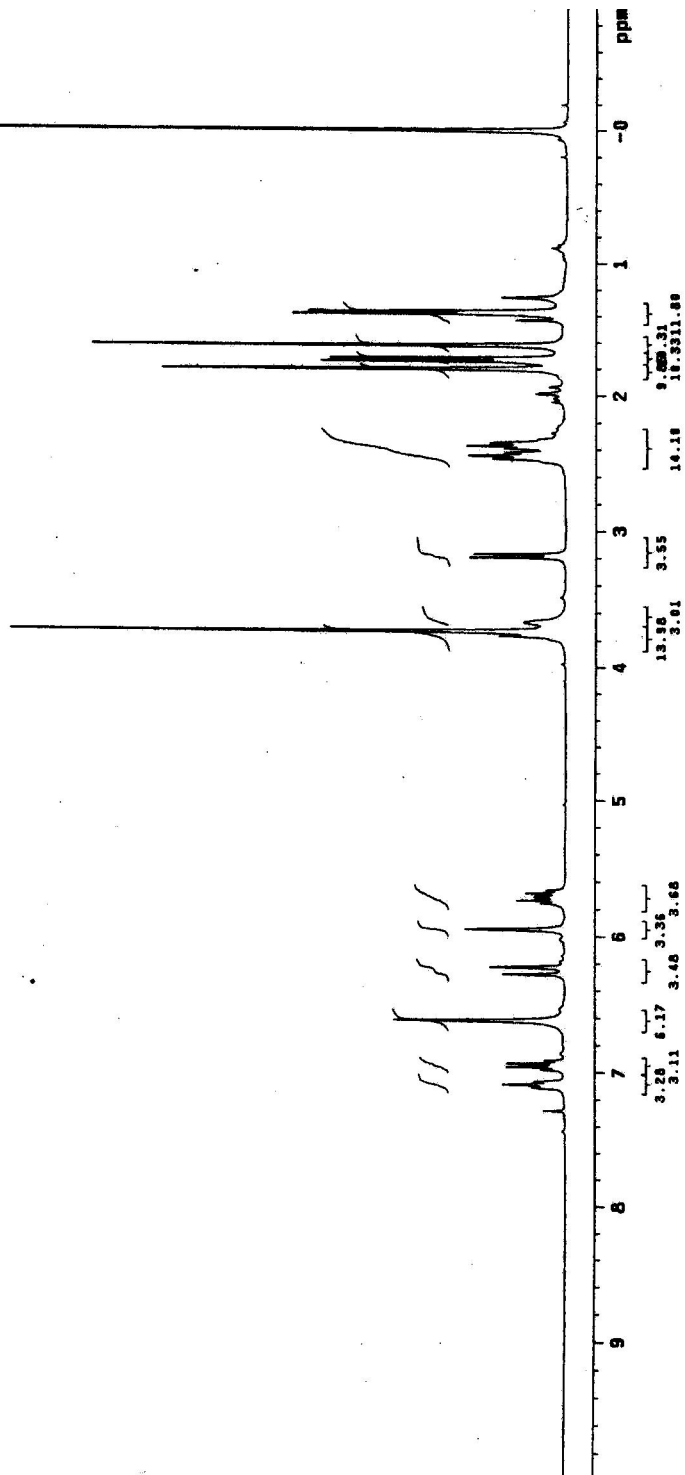

| INDEX | FREQUENCY | PPM     | HEIGHT |
|-------|-----------|---------|--------|
| 1     | 14558.628 | 152.815 | 16.4   |
| 2     | 12661.871 | 137.874 | 15.9   |
| 3     | 12646.898 | 137.593 | 28.6   |
| 4     | 11254.886 | 149.738 | 34.3   |
| 5     | 10548.687 | 139.856 | 39.5   |
| 6     | 10413.151 | 138.868 | 23.6   |
| 7     | 10289.877 | 135.385 | 45.5   |
| 8     | 10175.898 | 134.815 | 23.4   |
| 9     | 9826.621  | 139.283 | 21.1   |
| 10    | 9876.488  | 139.318 | 37.9   |
| 11    | 9259.148  | 152.769 | 48.2   |
| 12    | 5839.485  | 77.421  | 88.3   |
| 13    | 5807.723  | 77.099  | 89.2   |
| 14    | 5775.862  | 76.578  | 57.8   |
| 15    | 4977.888  | 85.885  | 24.4   |
| 16    | 4938.221  | 85.496  | 37.4   |
| 17    | 4985.895  | 85.941  | 43.5   |
| 18    | 3912.816  | 51.874  | 39.3   |
| 19    | 2360.534  | 31.296  | 38.9   |
| 20    | 2182.888  | 28.830  | 40.5   |
| 21    | 1526.283  | 20.236  | 42.2   |
| 22    | 1288.591  | 15.772  | 44.5   |
| 23    | 1073.132  | 14.228  | 42.6   |
| 24    | 844.468   | 11.198  | 36.9   |
| 25    | -4.845    | -8.862  | 86.3   |

# Selective Synthesis of Epolactaene Featuring Efficient..... Ze Tan and Ei-ichi Negishi\*

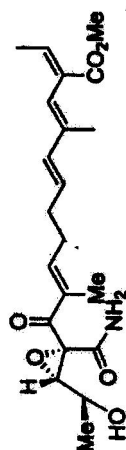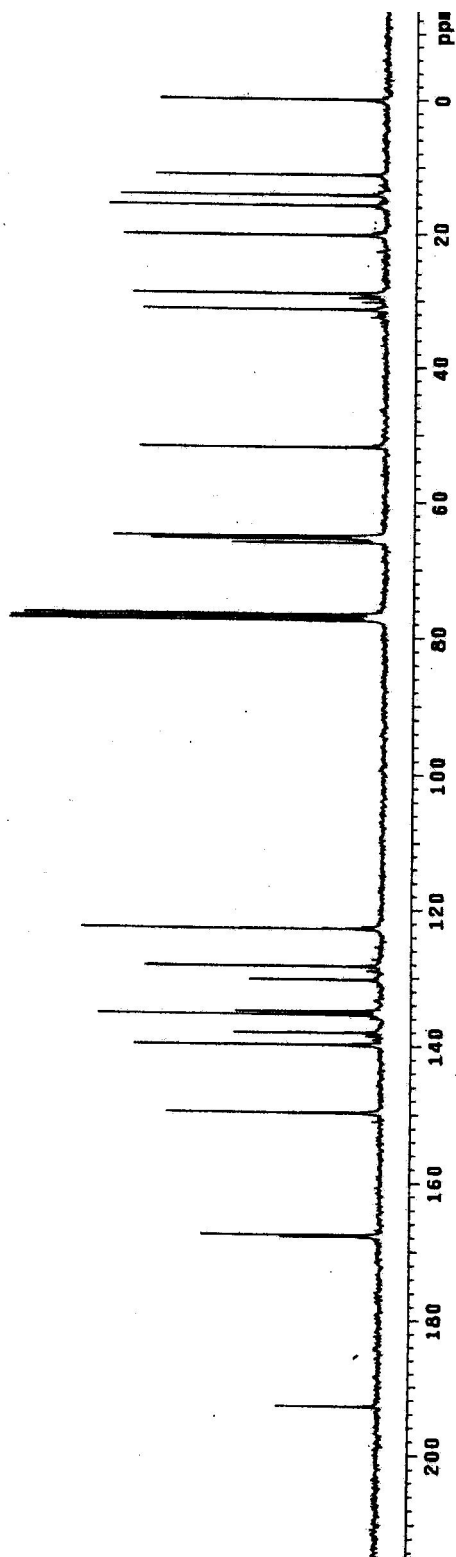

Selective Synthesis of Epolactaene Featuring Efficient.....  
Ze Tan and Ei-ichi Negishi\*

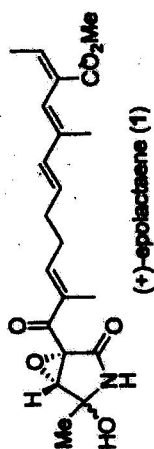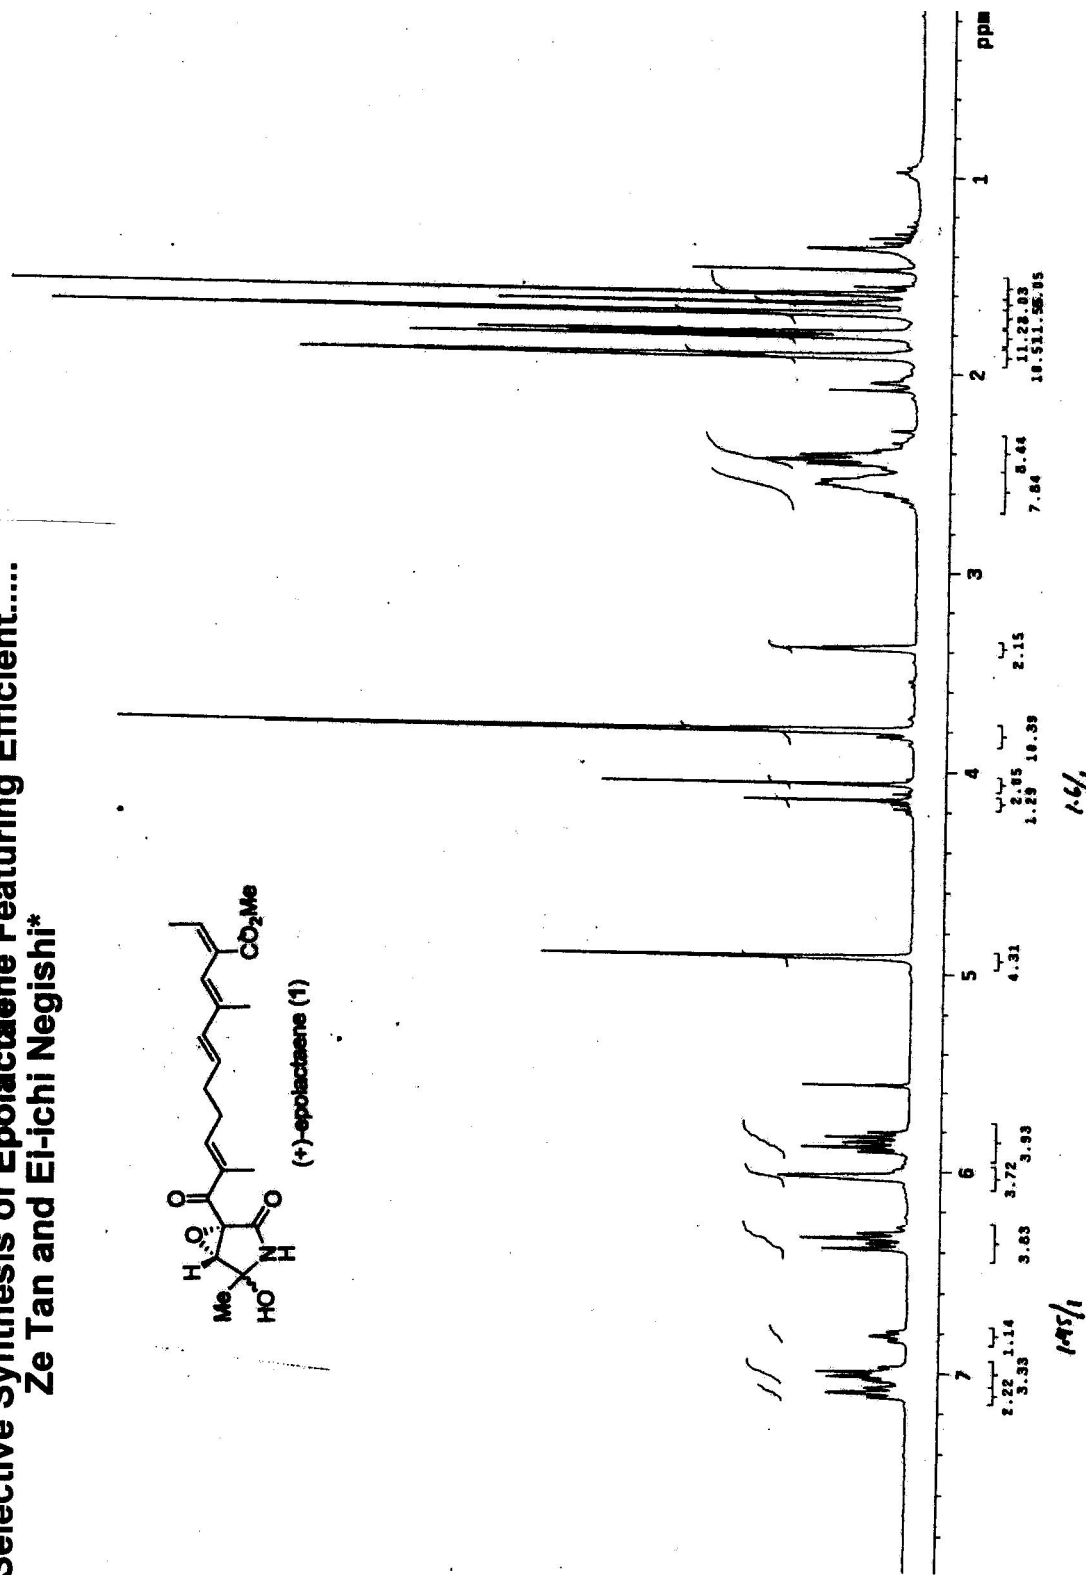

# Selective Synthesis of Epolactaene Featuring Efficient..... Ze Tan and Ei-ichi Negishi\*

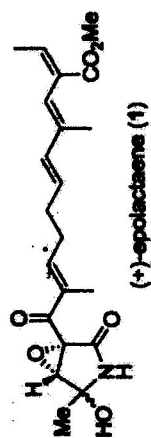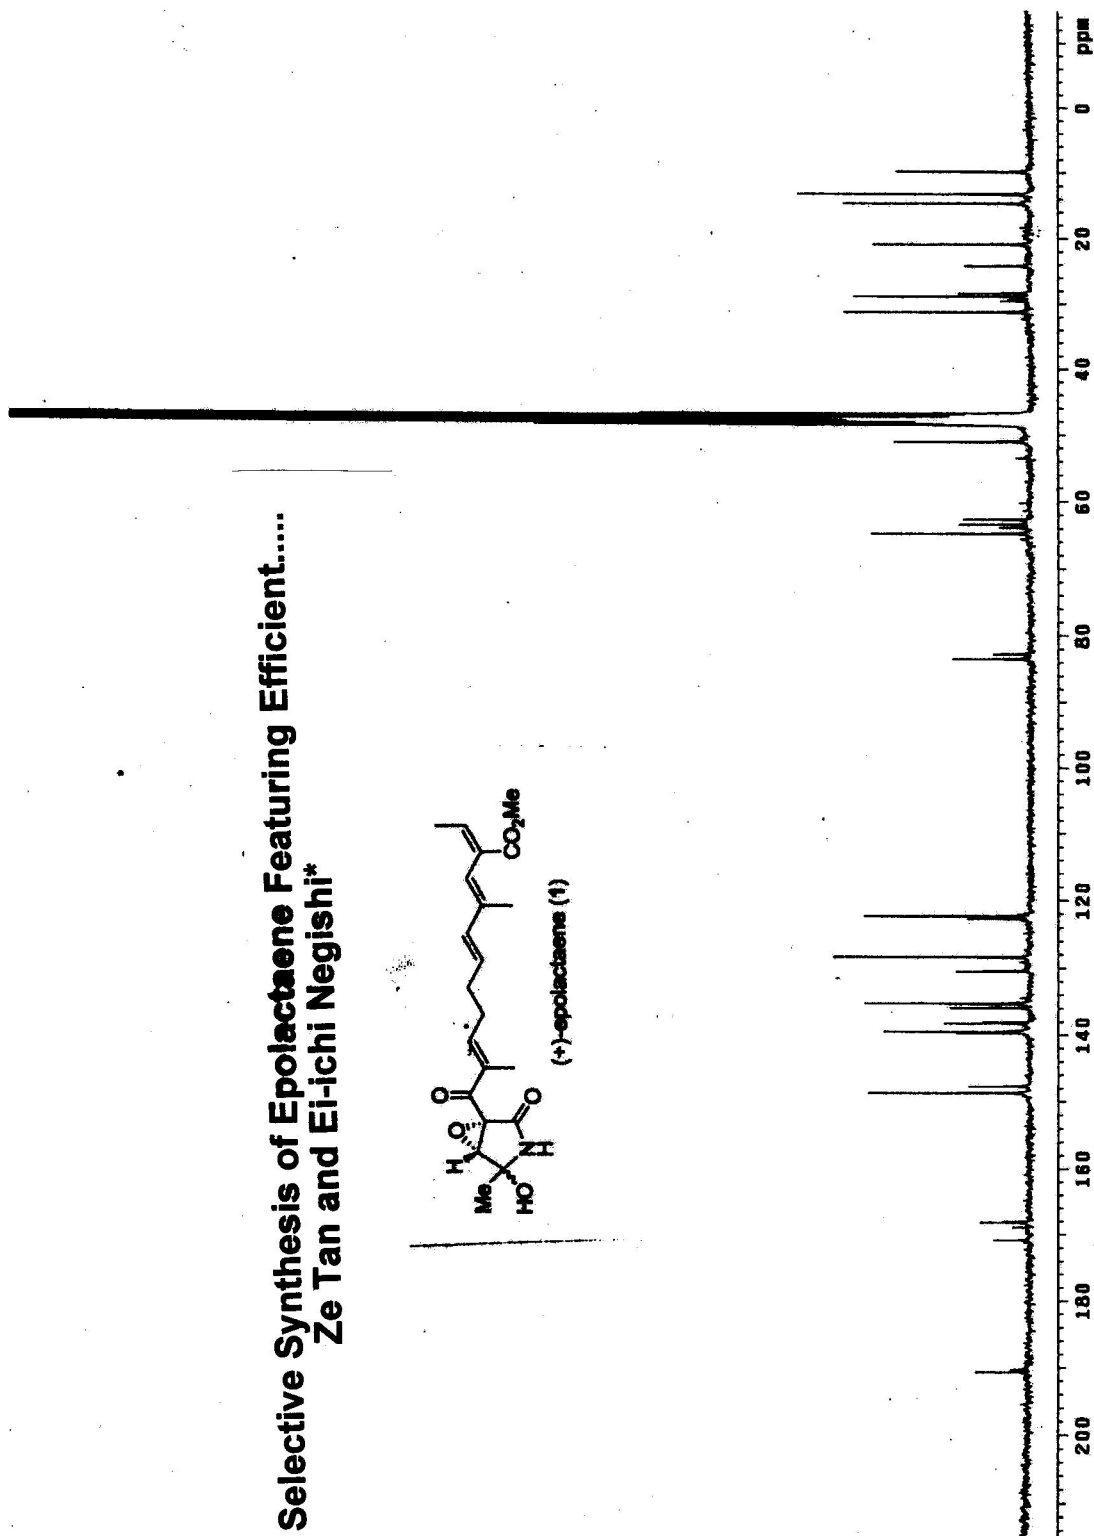

Supplement: Supplementary file 1 [file 4780657]
